# Supplementary material for: Adiponectin, Leptin, and IGF-1 Are Useful Diagnostic and Stratification Biomarkers of NAFLD
Source: PubMed Central journal article supplement (PMC8260936; doi:10.3389/fmed.2021.683250), 2021-06-23
Supplement: Data_Sheet_1.pdf [file Data_Sheet_1.pdf]

## *Supplementary Material*

### **Adiponectin, leptin and IGF-1 are useful diagnostic and stratification biomarkers of NAFLD**

**Vanda Marques<sup>1</sup>, Marta B. Afonso<sup>1</sup>, Nina Bierig<sup>2</sup>, Filipa Duarte-Ramos<sup>1,3</sup>, Álvaro Santos-Laso<sup>4</sup>, Raul Jimenez-Agüero<sup>4</sup>, Emma Eizaguirre<sup>4</sup>, Luis Bujanda<sup>4,5</sup>, Maria J. Pareja<sup>6</sup>, Rita Luís<sup>7</sup>, Adília Costa<sup>7</sup>, Mariana V. Machado<sup>8,9</sup>, Cristina Alonso<sup>10</sup>, Enara Arretxe<sup>10</sup>, José M. Alustiza<sup>4,11</sup>, Marcin Krawczyk<sup>12,13</sup>, Frank Lammert<sup>12</sup>, Dina G. Tiniakos<sup>14,15</sup>, Bertram Flehmig<sup>2</sup>, Helena Cortez-Pinto<sup>8,9</sup>, Jesus M. Banales<sup>4,5,16</sup>, Rui E. Castro<sup>1</sup>, Andrea Normann<sup>2</sup>, Cecília M. P. Rodrigues<sup>1\*</sup>**

<sup>1</sup>Research Institute for Medicines (iMed.Ulisboa), Faculty of Pharmacy, Universidade de Lisboa, Lisbon, Portugal

<sup>2</sup>Mediagnost, GmbH, Reutlingen, Germany

<sup>3</sup>EPIUnit - Instituto de Saúde Pública, Universidade do Porto, Oporto, Portugal

<sup>4</sup>Department of Liver and Gastrointestinal Diseases, Biodonostia Health Research Institute, Donostia University Hospital, University of the Basque Country (UPV/EHU), San Sebastian, Spain

<sup>5</sup>National Institute for the Study of Liver and Gastrointestinal Diseases (CIBERehd, Instituto de Salud Carlos III), Madrid, Spain

<sup>6</sup>Hospital de Valme, Sevilla, Spain

<sup>7</sup>Pathological Anatomy, Hospital de Santa Maria, Centro Hospitalar Universitário Lisboa Norte, Lisbon, Portugal

<sup>8</sup>Clinica Universitária de Gastreenterologia, Faculdade de Medicina, Universidade de Lisboa, Lisbon, Portugal

<sup>9</sup>Departamento de Gastreenterologia, Centro Hospitalar Universitário Lisboa Norte, Lisbon, Portugal

<sup>10</sup>OWL Metabolomics, Bizkaia Technology Park, Derio, Spain

<sup>11</sup>Radiology Service, Osatek, Donostia, Spain

<sup>12</sup>Department of Medicine II, Saarland University Medical Center, Homburg, Germany

<sup>13</sup>Laboratory of Metabolic Liver Diseases, Department of General, Transplant and Liver Surgery, Centre for Preclinical Research, Medical University of Warsaw, Warsaw, Poland

<sup>14</sup>Translational & Clinical Research Institute, Faculty of Medical Sciences, Newcastle University, Newcastle upon Tyne, UK

<sup>15</sup>Department of Pathology, Aretaieio Hospital, National and Kapodistrian University of Athens, Athens, Greece

<sup>16</sup>IKERBASQUE, Basque Foundation for Science, Bilbao, Spain

## 1 Supplementary Tables

**Table S1.** Histology data of patients in validation cohort.

|                              | NAFL (n = 100) | NASH (n = 94) |
|------------------------------|----------------|---------------|
| <b>Steatosis</b>             |                |               |
| 0 (< 5%)                     | 16 (16.0%)     | 0 (0.0%)      |
| 1 (5 – 33%)                  | 68 (68.0%)     | 12 (12.8%)    |
| 2 (34 – 66%)                 | 16 (16.0%)     | 34 (36.2%)    |
| 3 (> 66%)                    | 0 (0.0%)       | 48 (51.1%)    |
| <b>Lobular inflammation</b>  |                |               |
| 0 (none)                     | 6 (6.0%)       | 0 (0.0%)      |
| 1 (< 2 foci)                 | 64 (64.0%)     | 19 (20.2%)    |
| 2 (2 – 4 foci)               | 28 (28.0%)     | 45 (47.9%)    |
| 3 (> 4 foci)                 | 2 (2.0%)       | 30 (31.9%)    |
| <b>Ballooned hepatocytes</b> |                |               |
| 0 (none)                     | 21 (21.0%)     | 2 (2.1%)      |
| 1 (few)                      | 58 (58.0%)     | 34 (36.2%)    |
| 2 (many)                     | 21 (21.0%)     | 58 (61.7%)    |
| <b>Fibrosis stage</b>        |                |               |
| F0-2 (none to moderate)      | 90 (90.0%)     | 81 (86.2%)    |
| F3-4 (severe to cirrhosis)   | 8 (8.0%)       | 10 (10.6%)    |

Steatosis, lobular inflammation and ballooned hepatocytes were assessed according to NASH Clinical Research Network(1). Steatosis is expressed as % of affected hepatocytes. Lobular inflammation is expressed as necroinflammation foci per x20 optical field.

**Table S2.** Serum metabolites able to distinguish NAFL from NASH.

|                       | Serum lipidomics         |             |          | Correlation with serum adiponectin |
|-----------------------|--------------------------|-------------|----------|------------------------------------|
|                       | NAFL                     | NASH        | AUROC    |                                    |
| Arachidyl carnitine   | 0.34 ± 0.02 <sup>†</sup> | 0.28 ± 0.01 | 0.457    | 0.097                              |
| AC(14:2n-x)           | 1.13 ± 0.06 <sup>†</sup> | 0.97 ± 0.06 | 0.410    | 0.012                              |
| Deoxycholic acid      | 0.27 ± 0.05 <sup>‡</sup> | 0.34 ± 0.03 | 0.656**  | -0.094                             |
| Taurocholic acid      | 1.63 ± 1.26 <sup>†</sup> | 0.57 ± 0.18 | 0.568    | 0.235**                            |
| Glycocholic acid      | 0.45 ± 0.25 <sup>‡</sup> | 0.39 ± 0.14 | 0.580    | 0.169*                             |
| Cer(d18:1/20:0)       | 0.88 ± 0.03 <sup>§</sup> | 1.09 ± 0.04 | 0.596    | -0.039                             |
| Cer(d18:1/22:0)       | 0.71 ± 0.03 <sup>§</sup> | 0.89 ± 0.04 | 0.647*   | -0.034                             |
| Cer(d18:1/24:0)       | 0.79 ± 0.04 <sup>‡</sup> | 0.94 ± 0.04 | 0.618*   | 0.028                              |
| ChoE(16:1)            | 0.86 ± 0.05 <sup>§</sup> | 1.13 ± 0.06 | 0.590    | 0.164*                             |
| ChoE(20:5)            | 1.57 ± 0.19 <sup>†</sup> | 1.90 ± 0.25 | 0.518    | 0.041                              |
| PC(32:1)              | 1.15 ± 0.07 <sup>§</sup> | 1.59 ± 0.08 | 0.658**  | 0.021                              |
| PC(14:0/18:2)         | 0.60 ± 0.04 <sup>†</sup> | 0.74 ± 0.04 | 0.572    | 0.054                              |
| PC(16:0/18:1)         | 1.16 ± 0.03 <sup>‡</sup> | 1.26 ± 0.03 | 0.595    | 0.068                              |
| PC(14:0/20:4)         | 0.76 ± 0.06 <sup>‡</sup> | 0.94 ± 0.06 | 0.577    | 0.058                              |
| PC(18:0/18:1)         | 0.88 ± 0.04 <sup>§</sup> | 1.05 ± 0.04 | 0.626*   | 0.041                              |
| PC(18:0/18:2)         | 0.82 ± 0.02 <sup>†</sup> | 0.89 ± 0.02 | 0.554    | 0.120                              |
| PC(16:0/20:5)         | 1.46 ± 0.17 <sup>†</sup> | 1.85 ± 0.27 | 0.526    | 0.029                              |
| PC(18:3/18:3)         | 1.38 ± 0.11 <sup>‡</sup> | 1.70 ± 0.12 | 0.535    | 0.073                              |
| PC(18:0/20:3)         | 1.07 ± 0.05 <sup>§</sup> | 1.32 ± 0.06 | 0.583    | 0.000                              |
| PC(38:5)              | 1.37 ± 0.10 <sup>†</sup> | 1.65 ± 0.15 | 0.557    | 0.036                              |
| PC(18:0/22:4)         | 0.90 ± 0.04 <sup>†</sup> | 1.10 ± 0.06 | 0.604    | -0.004                             |
| PC(40:5)              | 1.10 ± 0.05 <sup>‡</sup> | 1.28 ± 0.06 | 0.606    | 0.039                              |
| PC(34:3)              | 0.47 ± 0.03 <sup>§</sup> | 0.61 ± 0.04 | 0.602    | 0.024                              |
| PC(36:3)              | 0.90 ± 0.03 <sup>†</sup> | 1.01 ± 0.03 | 0.542    | 0.118                              |
| PC(30:0)              | 0.53 ± 0.05 <sup>§</sup> | 0.77 ± 0.05 | 0.625*   | 0.003                              |
| PE(16:0/18:1)         | 1.78 ± 0.11 <sup>†</sup> | 1.99 ± 0.09 | 0.596    | 0.043                              |
| PE(16:0/18:2)         | 0.93 ± 0.04 <sup>‡</sup> | 1.11 ± 0.05 | 0.577    | 0.055                              |
| PC(16:0/17:0)         | 0.78 ± 0.04 <sup>†</sup> | 0.87 ± 0.03 | 0.540    | 0.164*                             |
| PC(33:1)              | 0.96 ± 0.04 <sup>§</sup> | 1.14 ± 0.04 | 0.596    | 0.105                              |
| PE(16:0/20:4)         | 1.55 ± 0.07 <sup>†</sup> | 1.79 ± 0.08 | 0.567    | 0.078                              |
| PC(15:0/20:3)         | 0.81 ± 0.05 <sup>†</sup> | 1.10 ± 0.08 | 0.555    | 0.009                              |
| PE(18:0/20:4)         | 1.55 ± 0.06 <sup>†</sup> | 1.81 ± 0.08 | 0.580    | 0.045                              |
| PE(16:0/22:6)         | 3.16 ± 0.18 <sup>†</sup> | 4.07 ± 0.27 | 0.524    | 0.139                              |
| DG(32:0)              | 0.40 ± 0.04 <sup>§</sup> | 0.58 ± 0.04 | 0.734*** | -0.160*                            |
| DG(32:1)              | 0.34 ± 0.04 <sup>§</sup> | 0.52 ± 0.04 | 0.698*** | -0.142*                            |
| DG(34:0)              | 0.74 ± 0.04 <sup>§</sup> | 0.97 ± 0.05 | 0.682*** | -0.196**                           |
| DG(34:1)              | 0.43 ± 0.03 <sup>§</sup> | 0.59 ± 0.03 | 0.694*** | -0.166*                            |
| DG(34:2)              | 0.41 ± 0.03 <sup>§</sup> | 0.54 ± 0.03 | 0.661**  | -0.194**                           |
| Stearic acid (18:0)   | 1.09 ± 0.02 <sup>§</sup> | 1.23 ± 0.03 | 0.635*   | -0.025                             |
| 18:1n-x               | 0.14 ± 0.01 <sup>‡</sup> | 0.19 ± 0.02 | 0.607    | -0.013                             |
| Arachidic acid (20:0) | 0.72 ± 0.02 <sup>†</sup> | 0.78 ± 0.02 | 0.578    | 0.039                              |
| 9,10-DiHOME           | 1.44 ± 0.16 <sup>†</sup> | 0.92 ± 0.10 | 0.431    | 0.059                              |
| 12,13-DiHOME          | 0.89 ± 0.09 <sup>†</sup> | 0.58 ± 0.06 | 0.429    | 0.098                              |
| PC(14:0/0:0)          | 0.29 ± 0.02 <sup>§</sup> | 0.37 ± 0.02 | 0.602    | 0.007                              |
| PC(0:0/14:0)          | 0.26 ± 0.02 <sup>§</sup> | 0.35 ± 0.02 | 0.643*   | -0.003                             |
| PC(16:0/0:0)          | 0.72 ± 0.01 <sup>†</sup> | 0.75 ± 0.01 | 0.508    | -0.062                             |
| PC(0:0/16:0)          | 0.63 ± 0.01 <sup>†</sup> | 0.66 ± 0.01 | 0.540    | -0.020                             |
| PC(0:0/16:1)          | 0.74 ± 0.04 <sup>§</sup> | 0.93 ± 0.04 | 0.608    | 0.130                              |
| PC(0:0/18:0)          | 0.54 ± 0.01 <sup>§</sup> | 0.61 ± 0.01 | 0.572    | -0.054                             |
| PC(18:0/0:0)          | 0.68 ± 0.01 <sup>§</sup> | 0.74 ± 0.01 | 0.576    | -0.081                             |
| PC(18:1/0:0)          | 0.09 ± 0.01 <sup>†</sup> | 0.10 ± 0.01 | 0.552    | 0.093                              |
| PC(18:2/0:0)          | 0.43 ± 0.03 <sup>§</sup> | 0.56 ± 0.03 | 0.628*   | 0.036                              |
| PC(0:0/18:3)          | 0.37 ± 0.03 <sup>†</sup> | 0.45 ± 0.04 | 0.560    | 0.107                              |
| PC(18:3/0:0)          | 0.40 ± 0.03 <sup>†</sup> | 0.46 ± 0.03 | 0.561    | 0.134                              |
| PC(18:3/0:0)          | 0.95 ± 0.08 <sup>§</sup> | 1.25 ± 0.07 | 0.625*   | -0.011                             |
| PC(20:2/0:0)          | 1.65 ± 0.13 <sup>§</sup> | 2.13 ± 0.12 | 0.583    | 0.110                              |
| PC(0:0/20:3)          | 3.64 ± 0.16 <sup>‡</sup> | 4.40 ± 0.21 | 0.534    | -0.033                             |

## Supplementary Material

|                                 |                          |             |          |                     |
|---------------------------------|--------------------------|-------------|----------|---------------------|
| PC(20:3/0:0)                    | 1.60 ± 0.05 <sup>†</sup> | 1.73 ± 0.06 | 0.525    | 0.043               |
| PC(20:3/0:0)                    | 1.71 ± 0.09 <sup>†</sup> | 1.90 ± 0.10 | 0.518    | 0.110               |
| PC(0:0/20:5)                    | 1.70 ± 0.17 <sup>†</sup> | 2.29 ± 0.35 | 0.543    | 0.028               |
| PC(20:5/0:0)                    | 1.45 ± 0.09 <sup>†</sup> | 1.78 ± 0.15 | 0.533    | 0.054               |
| PC(0:0/22:4)                    | 1.52 ± 0.07 <sup>†</sup> | 1.73 ± 0.07 | 0.623*   | -0.041              |
| PC(22:4/0:0)                    | 2.27 ± 0.11 <sup>†</sup> | 2.62 ± 0.12 | 0.611    | -0.016              |
| PC(0:0/22:5)                    | 1.45 ± 0.09 <sup>§</sup> | 1.83 ± 0.15 | 0.591    | -0.010              |
| PC(17:1/0:0)                    | 0.54 ± 0.02 <sup>§</sup> | 0.66 ± 0.03 | 0.570    | 0.079               |
| PE(0:0/16:0)                    | 0.51 ± 0.02 <sup>†</sup> | 0.57 ± 0.02 | 0.521    | 0.070               |
| PE(0:0/16:1)                    | 0.65 ± 0.04 <sup>§</sup> | 0.89 ± 0.04 | 0.691**  | -0.013              |
| PE(0:0/18:0)                    | 0.36 ± 0.01 <sup>§</sup> | 0.45 ± 0.02 | 0.632*   | 0.006               |
| PE(18:0/0:0)                    | 0.45 ± 0.02 <sup>§</sup> | 0.52 ± 0.02 | 0.577    | -0.022              |
| PE(18:3/0:0)                    | 0.37 ± 0.03 <sup>‡</sup> | 0.43 ± 0.02 | 0.581    | -0.039              |
| PE(0:0/20:3)                    | 0.72 ± 0.04 <sup>§</sup> | 0.93 ± 0.04 | 0.602    | -0.068              |
| PE(20:3/0:0)                    | 0.60 ± 0.03 <sup>§</sup> | 0.75 ± 0.03 | 0.580    | -0.059              |
| PE(20:4/0:0)                    | 0.81 ± 0.02 <sup>†</sup> | 0.88 ± 0.02 | 0.593    | -0.053              |
| LPE(20:5)                       | 0.59 ± 0.08 <sup>‡</sup> | 0.80 ± 0.13 | 0.578    | -0.005              |
| PE(20:5/0:0)                    | 0.55 ± 0.07 <sup>‡</sup> | 0.71 ± 0.11 | 0.550    | 0.000               |
| PE(22:4/0:0)                    | 0.79 ± 0.04 <sup>†</sup> | 0.91 ± 0.05 | 0.598    | -0.131              |
| PE(22:5/0:0)                    | 0.46 ± 0.02 <sup>‡</sup> | 0.54 ± 0.02 | 0.575    | -0.040              |
| PE(22:5/0:0)                    | 0.57 ± 0.03 <sup>‡</sup> | 0.66 ± 0.03 | 0.565    | 0.002               |
| PE(22:5/0:0)                    | 0.83 ± 0.05 <sup>†</sup> | 1.01 ± 0.06 | 0.584    | -0.020              |
| PE(0:0/22:6)                    | 1.61 ± 0.06 <sup>‡</sup> | 1.89 ± 0.08 | 0.526    | 0.074               |
| PE(22:6/0:0)                    | 1.49 ± 0.05 <sup>†</sup> | 1.66 ± 0.06 | 0.498    | 0.088               |
| LPI(16:0)                       | 0.96 ± 0.05 <sup>§</sup> | 1.18 ± 0.06 | 0.583    | 0.091               |
| LPI(18:0)                       | 0.91 ± 0.03 <sup>†</sup> | 1.03 ± 0.04 | 0.545    | 0.066               |
| LPI(18:1)                       | 0.92 ± 0.06 <sup>‡</sup> | 1.07 ± 0.06 | 0.567    | 0.156 <sup>°</sup>  |
| LPI(18:1)                       | 0.99 ± 0.07 <sup>‡</sup> | 1.26 ± 0.09 | 0.571    | 0.103               |
| PC(O-18:1/22:4)                 | 1.77 ± 0.05 <sup>‡</sup> | 1.57 ± 0.04 | 0.350    | 0.223**             |
| PC(O-22:1/20:4)                 | 1.47 ± 0.06 <sup>†</sup> | 1.31 ± 0.06 | 0.352    | 0.166 <sup>°</sup>  |
| PC(O-24:1/20:4)                 | 1.74 ± 0.07 <sup>†</sup> | 1.55 ± 0.07 | 0.371    | 0.178 <sup>°</sup>  |
| PE(18:1e/22:6)                  | 1.76 ± 0.12 <sup>†</sup> | 2.00 ± 0.11 | 0.510    | 0.173 <sup>°</sup>  |
| PE(P-18:0/0:0)                  | 0.34 ± 0.02 <sup>†</sup> | 0.39 ± 0.02 | 0.520    | 0.100               |
| PE(P-20:0/0:0)                  | 0.32 ± 0.02 <sup>†</sup> | 0.37 ± 0.02 | 0.549    | 0.026               |
| SM(d18:0/14:0)                  | 0.98 ± 0.04 <sup>§</sup> | 1.17 ± 0.04 | 0.601    | 0.144 <sup>°</sup>  |
| SM(d18:0/18:0)                  | 2.55 ± 0.19 <sup>‡</sup> | 3.03 ± 0.19 | 0.662**  | -0.087              |
| SM(d18:0/22:0)                  | 1.25 ± 0.09 <sup>§</sup> | 1.70 ± 0.09 | 0.747*** | -0.090              |
| SM(d18:1/24:1) + SM(d18:2/24:0) | 1.42 ± 0.03 <sup>†</sup> | 1.33 ± 0.04 | 0.351    | 0.305**             |
| SM(42:3)                        | 1.45 ± 0.04 <sup>§</sup> | 1.27 ± 0.04 | 0.320    | 0.368**             |
| SM(38:0)                        | 1.18 ± 0.07 <sup>§</sup> | 1.58 ± 0.08 | 0.759*** | -0.111              |
| TG(42:0)                        | 0.27 ± 0.11 <sup>§</sup> | 0.31 ± 0.04 | 0.674**  | -0.084              |
| TG(44:0)                        | 0.39 ± 0.12 <sup>§</sup> | 0.57 ± 0.06 | 0.707*** | -0.121              |
| TG(44:1)                        | 0.41 ± 0.17 <sup>§</sup> | 0.53 ± 0.06 | 0.674**  | -0.095              |
| TG(45:0)                        | 0.69 ± 0.06 <sup>‡</sup> | 0.78 ± 0.04 | 0.611    | -0.059              |
| TG(46:0)                        | 0.50 ± 0.10 <sup>§</sup> | 0.86 ± 0.09 | 0.738*** | -0.150 <sup>°</sup> |
| TG(46:1)                        | 0.46 ± 0.11 <sup>§</sup> | 0.78 ± 0.08 | 0.702*** | -0.141 <sup>°</sup> |
| TG(46:2)                        | 0.45 ± 0.12 <sup>§</sup> | 0.68 ± 0.07 | 0.670**  | -0.125              |
| TG(47:0)                        | 0.74 ± 0.07 <sup>§</sup> | 1.10 ± 0.10 | 0.698*** | -0.133              |
| TG(47:1)                        | 0.66 ± 0.08 <sup>§</sup> | 0.94 ± 0.08 | 0.668**  | -0.121              |
| TG(47:2)                        | 0.59 ± 0.07 <sup>§</sup> | 0.76 ± 0.06 | 0.625*   | -0.098              |
| TG(48:0)                        | 0.77 ± 0.10 <sup>§</sup> | 1.35 ± 0.13 | 0.736*** | -0.176 <sup>°</sup> |
| TG(52:4)                        | 1.90 ± 0.15 <sup>§</sup> | 2.91 ± 0.29 | 0.686*** | -0.194**            |
| TG(48:1)                        | 0.72 ± 0.10 <sup>§</sup> | 1.23 ± 0.10 | 0.714*** | -0.170 <sup>°</sup> |
| TG(55:2)                        | 0.90 ± 0.07 <sup>§</sup> | 1.28 ± 0.09 | 0.676**  | -0.112              |
| TG(55:3)                        | 1.11 ± 0.07 <sup>§</sup> | 1.50 ± 0.11 | 0.628*   | -0.082              |
| TG(55:4)                        | 1.24 ± 0.08 <sup>†</sup> | 1.52 ± 0.10 | 0.567    | -0.064              |
| TG(58:5)                        | 2.84 ± 0.23 <sup>§</sup> | 4.14 ± 0.36 | 0.655**  | -0.125              |
| TG(48:2)                        | 0.63 ± 0.08 <sup>§</sup> | 1.00 ± 0.08 | 0.675**  | -0.141 <sup>°</sup> |
| TG(48:3)                        | 0.56 ± 0.08 <sup>§</sup> | 0.84 ± 0.08 | 0.639*   | -0.139              |
| TG(49:0)                        | 0.76 ± 0.09 <sup>§</sup> | 1.28 ± 0.14 | 0.710*** | -0.157 <sup>°</sup> |
| TG(49:1)                        | 0.94 ± 0.10 <sup>§</sup> | 1.55 ± 0.15 | 0.678**  | -0.149 <sup>°</sup> |
| TG(49:2)                        | 0.87 ± 0.08 <sup>§</sup> | 1.30 ± 0.10 | 0.656**  | -0.128              |
| TG(50:0)                        | 0.78 ± 0.14 <sup>§</sup> | 1.50 ± 0.17 | 0.738*** | -0.172 <sup>°</sup> |

|          |                           |              |          |          |
|----------|---------------------------|--------------|----------|----------|
| TG(50:1) | 1.14 ± 0.07 <sup>§</sup>  | 1.63 ± 0.09  | 0.714*** | -0.185** |
| TG(50:2) | 1.17 ± 0.07 <sup>§</sup>  | 1.61 ± 0.09  | 0.688*** | -0.159*  |
| TG(50:3) | 1.04 ± 0.06 <sup>§</sup>  | 1.39 ± 0.08  | 0.638*   | -0.116   |
| TG(50:4) | 0.93 ± 0.08 <sup>‡</sup>  | 1.24 ± 0.11  | 0.588    | -0.125   |
| TG(51:1) | 1.04 ± 0.11 <sup>§</sup>  | 1.78 ± 0.17  | 0.697*** | -0.166*  |
| TG(51:3) | 1.29 ± 0.10 <sup>§</sup>  | 1.87 ± 0.14  | 0.646*   | -0.132   |
| TG(51:2) | 1.11 ± 0.06 <sup>†</sup>  | 1.44 ± 0.10  | 0.575    | -0.104   |
| TG(52:0) | 0.63 ± 0.18 <sup>§</sup>  | 1.17 ± 0.17  | 0.754*** | -0.135   |
| TG(52:1) | 1.05 ± 0.11 <sup>§</sup>  | 1.79 ± 0.14  | 0.737*** | -0.209** |
| TG(52:2) | 1.45 ± 0.05 <sup>‡</sup>  | 1.65 ± 0.06  | 0.641*   | -0.157*  |
| TG(53:0) | 1.02 ± 0.03 <sup>†</sup>  | 1.13 ± 0.04  | 0.663**  | -0.077   |
| TG(53:1) | 0.76 ± 0.08 <sup>§</sup>  | 1.29 ± 0.11  | 0.721*** | -0.173*  |
| TG(53:2) | 1.37 ± 0.10 <sup>§</sup>  | 1.91 ± 0.15  | 0.646*   | -0.135   |
| TG(53:3) | 1.35 ± 0.08 <sup>†</sup>  | 1.70 ± 0.11  | 0.589    | -0.096   |
| TG(53:3) | 0.49 ± 0.07 <sup>§</sup>  | 0.67 ± 0.06  | 0.700*** | -0.113   |
| TG(54:1) | 0.74 ± 0.15 <sup>§</sup>  | 1.37 ± 0.16  | 0.748*** | -0.146*  |
| TG(54:2) | 1.35 ± 0.09 <sup>§</sup>  | 1.90 ± 0.12  | 0.693*** | -0.172*  |
| TG(54:5) | 3.24 ± 0.16 <sup>†</sup>  | 3.94 ± 0.24  | 0.625*   | -0.153*  |
| TG(56:1) | 0.55 ± 0.08 <sup>§</sup>  | 0.72 ± 0.06  | 0.694*** | -0.103   |
| TG(56:2) | 1.01 ± 0.15 <sup>§</sup>  | 1.45 ± 0.13  | 0.695*** | -0.114   |
| TG(56:3) | 1.47 ± 0.11 <sup>‡</sup>  | 1.83 ± 0.12  | 0.622*   | -0.059   |
| TG(56:7) | 14.47 ± 1.20 <sup>†</sup> | 19.70 ± 1.96 | 0.546    | -0.047   |
| TG(58:1) | 0.60 ± 0.08 <sup>‡</sup>  | 0.73 ± 0.06  | 0.660**  | -0.089   |
| TG(58:2) | 0.73 ± 0.08 <sup>‡</sup>  | 0.90 ± 0.07  | 0.665**  | -0.098   |
| TG(58:3) | 1.06 ± 0.11 <sup>†</sup>  | 1.30 ± 0.10  | 0.648**  | -0.111   |
| TG(60:2) | 0.60 ± 0.06 <sup>‡</sup>  | 0.73 ± 0.06  | 0.650**  | -0.061   |
| TG(60:3) | 0.85 ± 0.08 <sup>†</sup>  | 0.97 ± 0.07  | 0.633*   | -0.047   |

Values depicted as mean ± SEM; relative quantifications. Applied in validation cohort; n = 91, NAFL; n = 90, NASH. AC, acylcarnitine; Cer, ceramide; ChoE, cholesteryl ester; Di-HOME, dihydroxy-octadecadenoic acid; DG, diglyceride; LPE, lysophosphatidylethanolamine; LPI, lysophosphatidylinositol; PC, phosphatidylcholine; PE, phosphatidylethanolamine; SM, sphingomyelin; TG, triglyceride. \*  $p < 0.05$ ; \*\*  $p < 0.01$ ; \*\*\*  $p < 0.001$ . NAFL versus NASH: † $p < 0.05$ ; ‡ $p < 0.01$ ; § $p < 0.001$ .

**Table S3.** Specific serum lipid signature of advanced liver fibrosis and its association with IGF-1 serum levels.

|                                                    | Serum lipidomics |                          | Correlation with serum IGF-1 |
|----------------------------------------------------|------------------|--------------------------|------------------------------|
|                                                    | F0-2             | F3-4                     |                              |
| Cholic acid                                        | 0.52 ± 0.11      | 0.97 ± 0.37 <sup>†</sup> | 0.188*                       |
| Deoxycholic acid                                   | 0.29 ± 0.03      | 0.42 ± 0.08 <sup>†</sup> | 0.084                        |
| Taurocholic acid                                   | 0.41 ± 0.10      | 8.70 ± 7.43 <sup>‡</sup> | -0.116                       |
| Taurodeoxycholic acid                              | 0.19 ± 0.04      | 1.23 ± 0.58 <sup>‡</sup> | -0.067                       |
| Taurochenodeoxycholic acid                         | 0.33 ± 0.06      | 5.95 ± 5.12 <sup>‡</sup> | -0.120                       |
| Tauroursodeoxycholic +<br>Taurohyodeoxycholic acid | 0.40 ± 0.05      | 2.40 ± 1.82 <sup>†</sup> | -0.136                       |
| Glycocholic acid                                   | 0.26 ± 0.08      | 2.18 ± 1.47 <sup>‡</sup> | -0.073                       |
| Glycochenodeoxycholic acid                         | 0.21 ± 0.02      | 1.06 ± 0.65 <sup>‡</sup> | -0.110                       |
| Glycodeoxycholic acid                              | 0.15 ± 0.02      | 0.62 ± 0.25 <sup>‡</sup> | -0.038                       |
| ChoE(18:2)                                         | 0.72 ± 0.02      | 0.61 ± 0.06 <sup>†</sup> | 0.085                        |
| PC(18:0/22:4)                                      | 0.99 ± 0.04      | 1.14 ± 0.10 <sup>†</sup> | 0.097                        |
| PC(17:1/18:1)                                      | 0.75 ± 0.02      | 0.59 ± 0.08 <sup>†</sup> | 0.070                        |
| PC(17:0/18:2)                                      | 0.73 ± 0.02      | 0.59 ± 0.05 <sup>†</sup> | 0.159*                       |
| PC(15:0/22:6)                                      | 2.21 ± 0.09      | 1.39 ± 0.21 <sup>‡</sup> | 0.113                        |
| FFA 20:3n-x                                        | 0.49 ± 0.01      | 0.64 ± 0.08 <sup>†</sup> | 0.003                        |
| Mead acid (20:3n-9)                                | 1.06 ± 0.04      | 1.97 ± 0.47 <sup>§</sup> | -0.018                       |
| Adrenic acid (22:4n-6)                             | 1.27 ± 0.04      | 1.72 ± 0.18 <sup>†</sup> | -0.016                       |
| Docosapentaenoic acid (22:5n-6)                    | 0.82 ± 0.03      | 1.06 ± 0.10 <sup>‡</sup> | 0.013                        |
| PC(18:1/0:0)                                       | 0.09 ± 0.00      | 0.06 ± 0.01 <sup>‡</sup> | 0.012                        |
| PC(20:2/0:0)                                       | 1.78 ± 0.08      | 2.73 ± 0.47 <sup>‡</sup> | 0.012                        |
| PC(20:3/0:0)                                       | 1.74 ± 0.07      | 2.24 ± 0.24 <sup>†</sup> | 0.018                        |
| PE(P-20:2/0:0)                                     | 0.46 ± 0.02      | 0.35 ± 0.06 <sup>†</sup> | -0.007                       |
| SM(33:1)                                           | 1.06 ± 0.02      | 0.87 ± 0.08 <sup>†</sup> | 0.082                        |
| SM(d18:1/17:0)                                     | 1.16 ± 0.02      | 0.98 ± 0.08 <sup>†</sup> | 0.014                        |
| SM(d18:2/14:0)                                     | 1.20 ± 0.03      | 0.93 ± 0.12 <sup>†</sup> | -0.056                       |
| TG(58:5)                                           | 3.39 ± 0.23      | 3.95 ± 0.52 <sup>†</sup> | 0.120                        |

Values depicted as mean ± SEM; relative quantifications. Applied in validation cohort; n ≤ 174, F0-2; n ≤ 15, F3-4. ChoE, cholesteryl ester; FFA, free fatty acid; PC, phosphatidylcholine; PE, phosphatidylethanolamine; SM, sphingomyelin; TG, triglyceride. \**p* < 0.05. F0-2 versus F3-4: <sup>†</sup>*p* < 0.05; <sup>‡</sup>*p* < 0.01; <sup>§</sup>*p* < 0.001.

## 2 Supplementary Figures

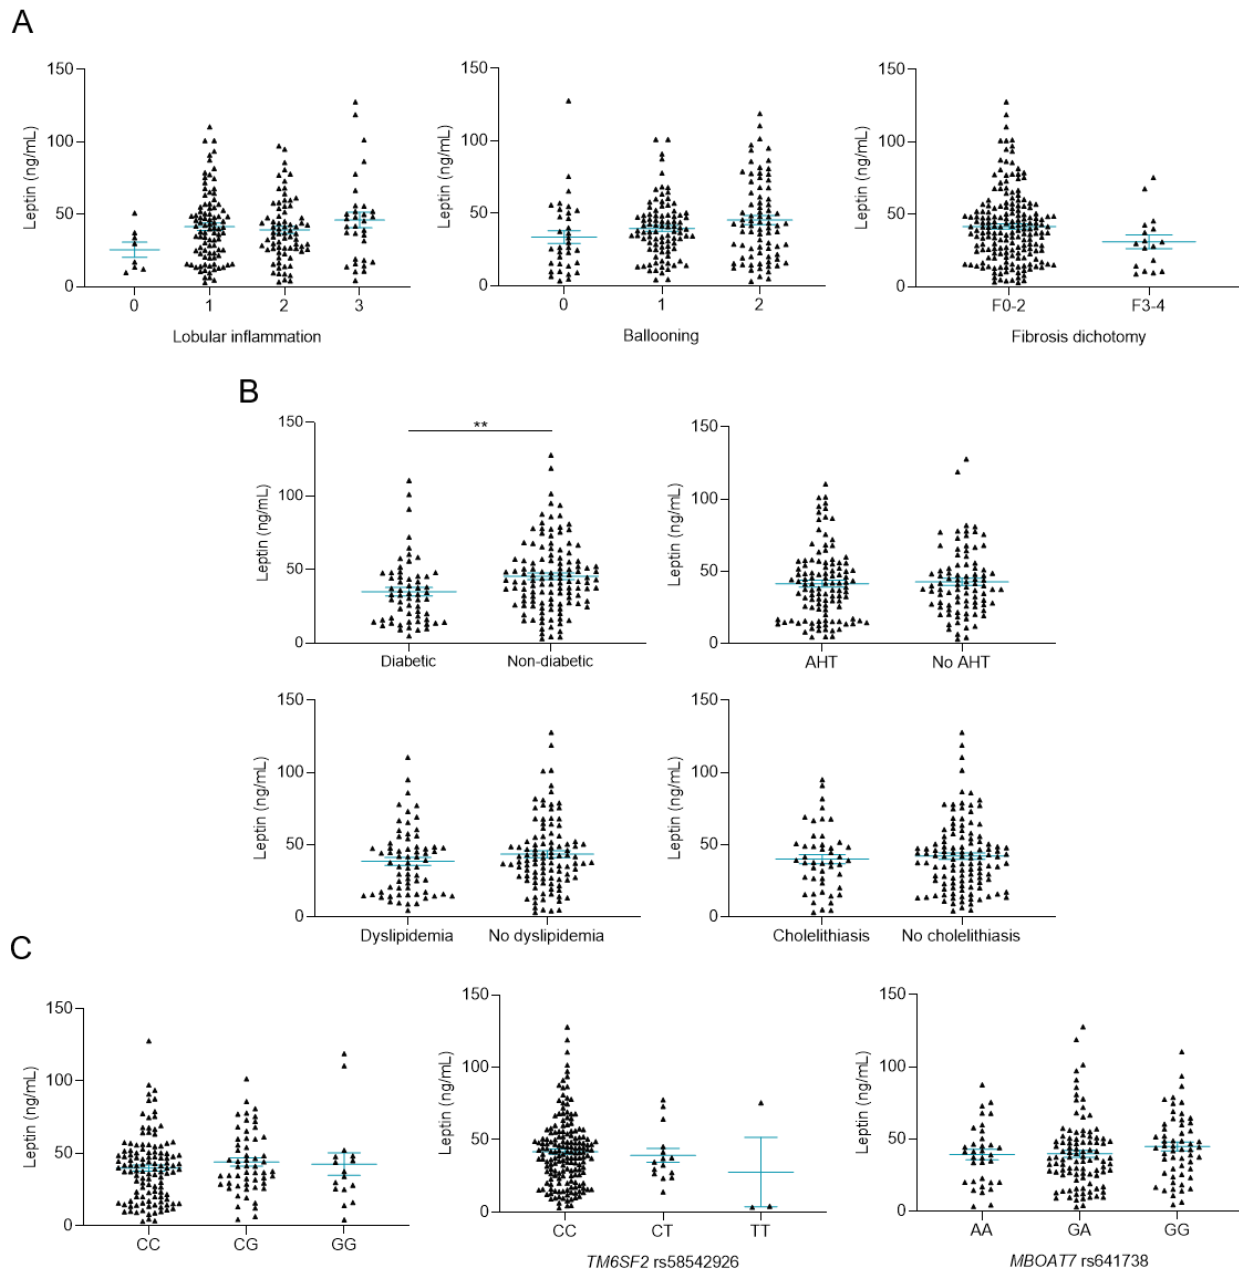

**Figure S1. Leptin levels in the validation cohort.** No significant differences were found in circulating leptin levels according to (A) severity of liver histology: lobular inflammation (n = 8, score 0; n = 92, score 1; n = 73, score 2; n = 32, score 3), ballooning (n = 34, score 0; n = 92, score 1; n = 79, score 2), fibrosis dichotomy (n = 184, F0-2; n = 17, F3-4); (B) presence of co-morbidities: diabetes (n = 60, diabetic; n = 121, non-diabetic), AHT (n = 110, AHT; n = 88, no AHT), dyslipidemia (n = 67, dyslipidemia; n = 104, no dyslipidemia), cholelithiasis (n = 47, cholelithiasis; n = 118, no cholelithiasis); and (C) presence of NAFLD-risk conferring polymorphisms: PNPLA3 rs738409 (n = 117, CC; n = 55, CG; n = 16, GG), TM6SF2 rs58542926 (n = 170, CC; n = 15, CT; n = 3, TT), MBOAT7 rs641738 (n = 34, AA; n = 98, GA; n = 56, GG). \*\*  $p < 0.01$ .

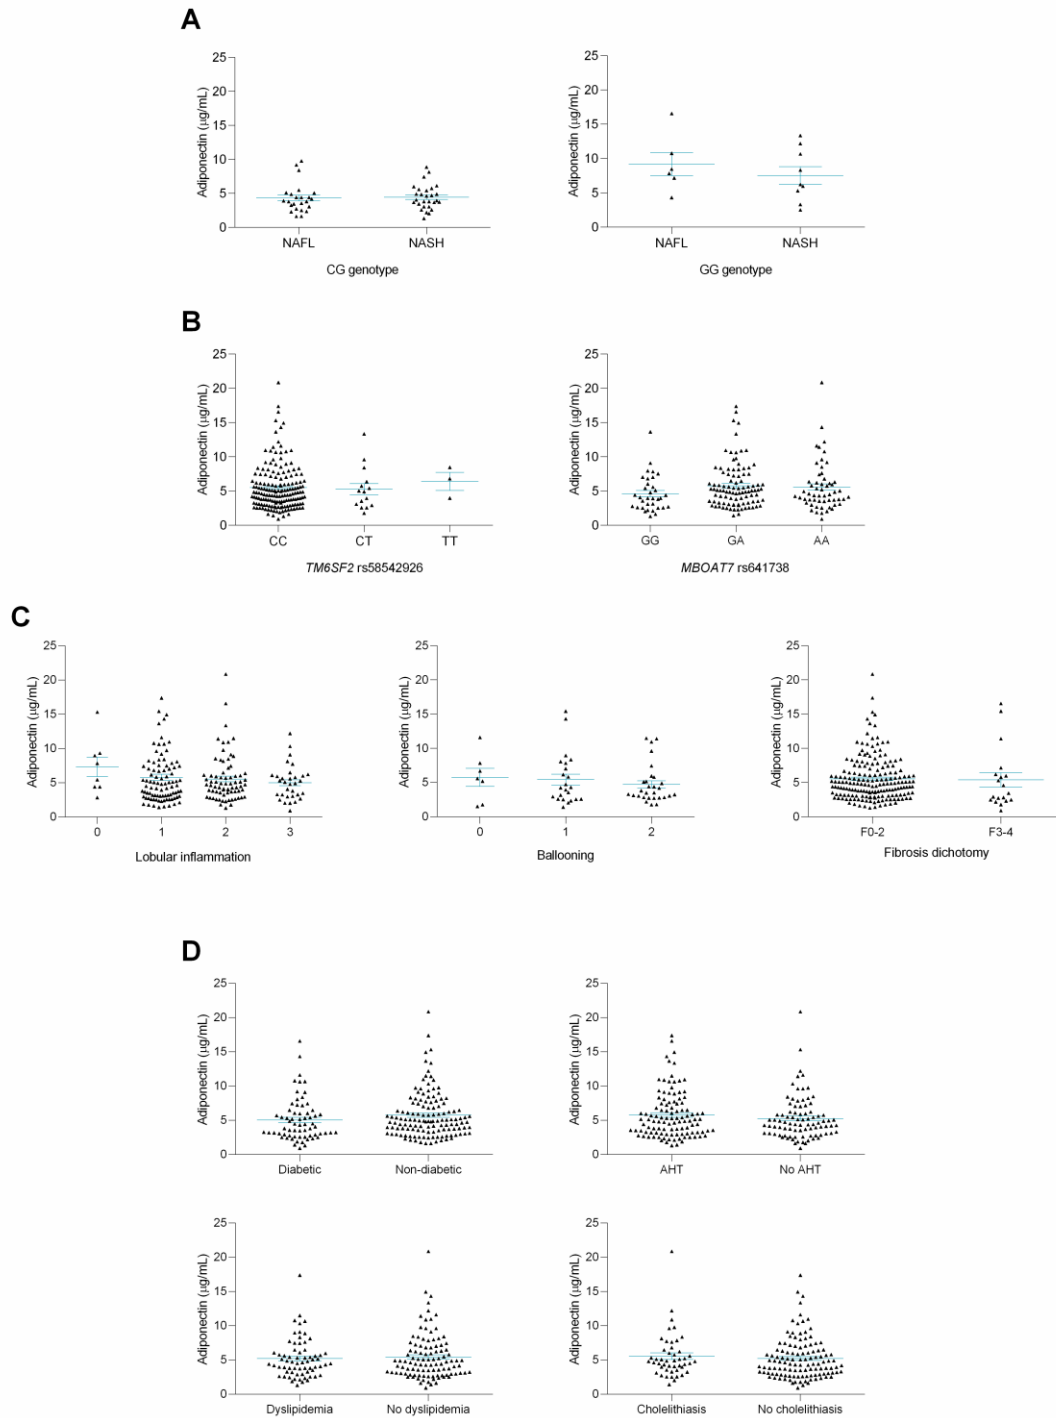

**Figure S2. Adiponectin levels in the validation cohort.** No significant differences were found in circulating adiponectin levels according to (A) *PNPLA3* rs738409 CG genotype (n = 24, NAFL; n = 28, NASH) or GG genotype (n = 6, NAFL; n = 9, NASH); (B) *TM6SF2* rs58542926 (n = 170, CC; n = 15, CT; n = 3, TT) and *MBOAT7* rs641738 (n = 34, AA; n = 98, GA; n = 56, GG); (C) severity of liver histology: lobular inflammation (n = 8, score 0; n = 92, score 1; n = 73, score 2; n = 32, score 3), ballooning (n = 7, score 0; n = 23, score 1; n = 29, score 2), fibrosis dichotomy (n = 183, F0-2; n = 19, F3-4); and (D) presence of co-morbidities: diabetes (n = 66, diabetic; n = 132, non-diabetic), AHT (n



= 110, AHT; n = 88, no AHT), dyslipidemia (n = 67, dyslipidemia; n = 104, no dyslipidemia) and cholelithiasis (n = 47, cholelithiasis; n = 118, no cholelithiasis).

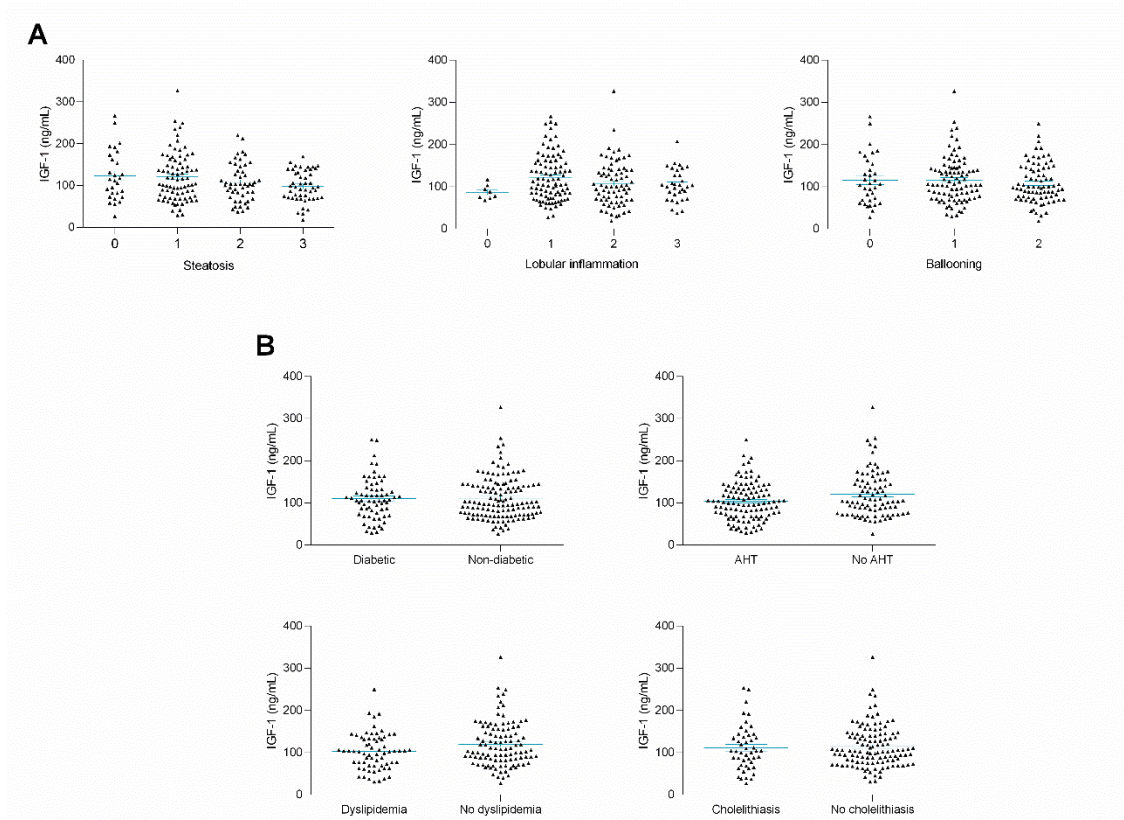

**Figure S3. IGF-1 levels in the validation cohort.** No significant differences were found in circulating levels of IGF-1 according to **(A)** severity of liver histology: steatosis (n = 28, score 0; n = 80, score 1; n = 50, score 2; n = 48, score 3), lobular inflammation (n = 8, score 0; n = 92, score 1; n = 73, score 2; n = 32, score 3), ballooning (n = 34, score 0; n = 92, score 1; n = 79, score 2); and **(B)** presence of comorbidities: diabetes (n = 132, diabetic; n = 66, non-diabetic), AHT (n = 110, AHT; n = 88, no AHT), dyslipidemia (n = 67, dyslipidemia; n = 104, no dyslipidemia) and cholelithiasis (n = 47, cholelithiasis; n = 118, no cholelithiasis).

### 3 Supplementary References

1. Juluri R, Vuppalanchi R, Olson J, Ünalp A, Natta ML Van, Cummings OW, Tonascia J, Chalasani N. Generalizability of the NASH CRN Histological Scoring System for Nonalcoholic Fatty Liver Disease. *J Clin Gastroenterol* (2011) **45**:55–58. doi:10.1097/MCG.0b013e3181dd1348
